# Supplementary material for: Tsunami scenario triggered by submarine landslide offshore of northern Sumatra Island and its hazard assessment
Source: Copernicus journal article supplement (doi:10.5194/nhess-2021-375), 2022-01-14
Supplement: Supplementary file [file nhess-2021-375-AC1-supplement.pdf]

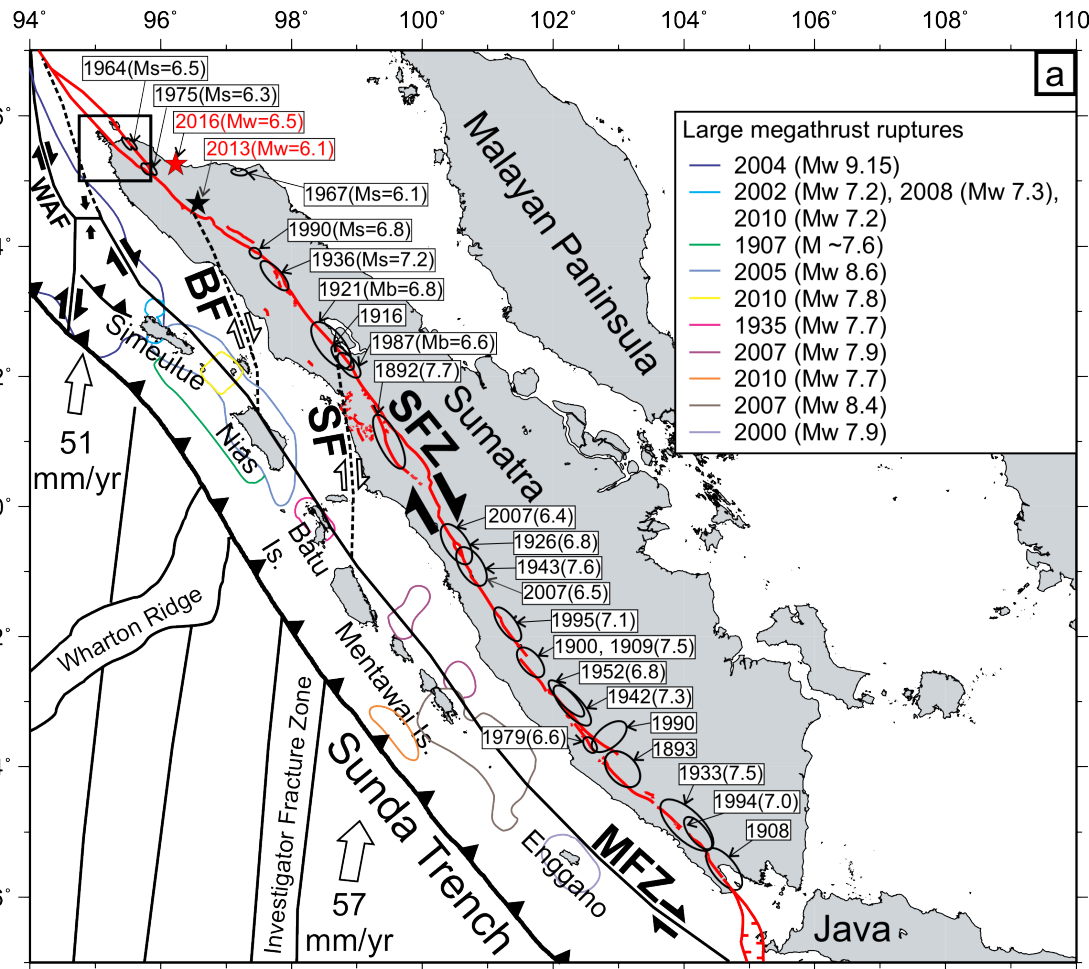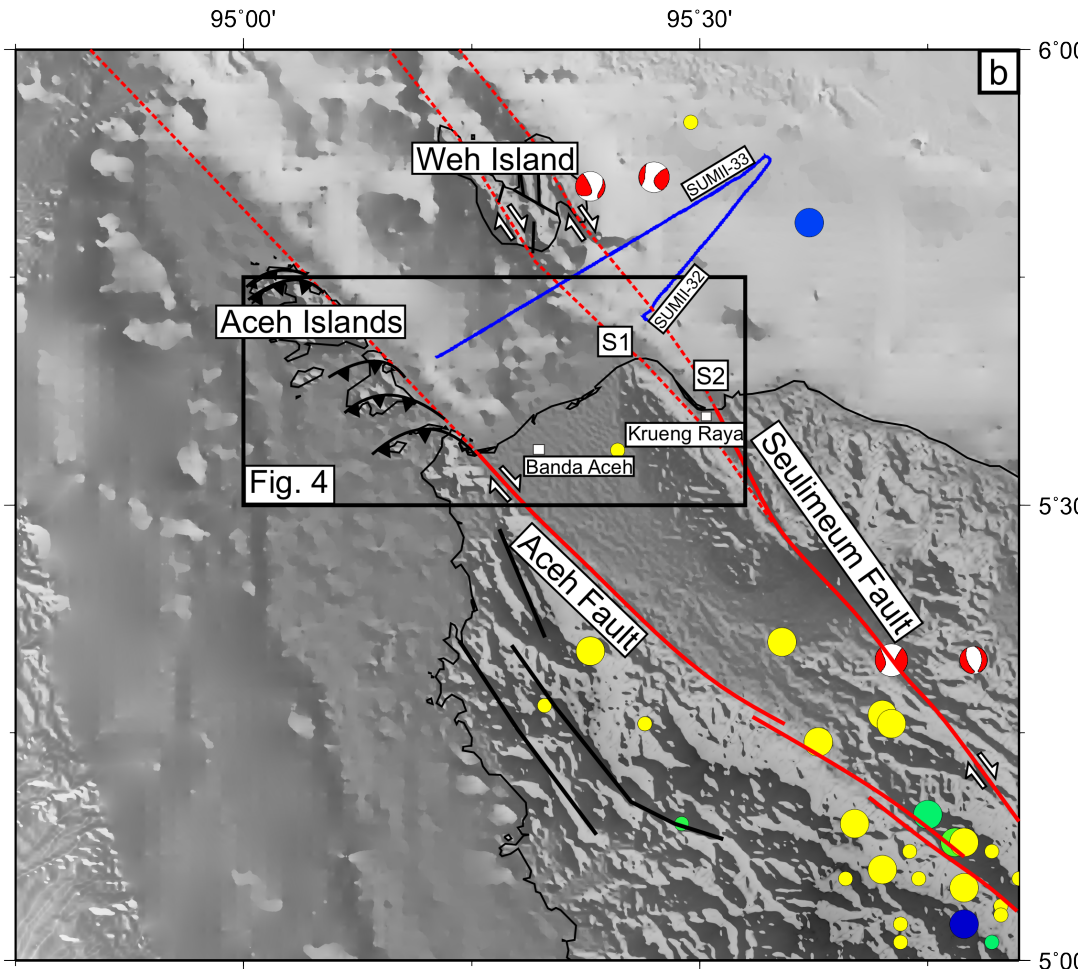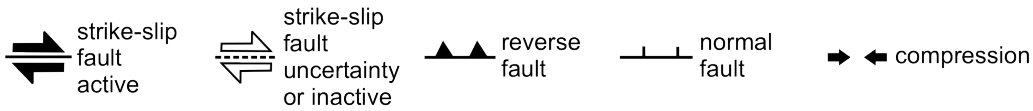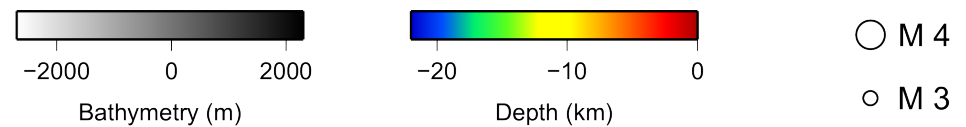

Figure 1
