# Supplementary material for: Tsunami scenario triggered by submarine landslide offshore of northern Sumatra Island and its hazard assessment
Source: Copernicus journal article supplement (doi:10.5194/nhess-2021-375), 2022-01-14
Supplement: Supplementary file [file nhess-2021-375-AC2-supplement.pdf]

**Supplementary material for**

**Tsunami scenario triggered by submarine landslide offshore  
of northern Sumatra Island and its hazard assessment**

Haekal A. Haridhi<sup>1,9,10</sup>, Bor Shouh Huang<sup>2,\*</sup>, Kuo Liang Wen<sup>3</sup>, Arif Mirza<sup>4</sup>, Syamsul Rizal<sup>1,9</sup>, Syahrul Purnawan<sup>1,9</sup>, Ilham Fajri<sup>12</sup>, Frauke Klingelhoefer<sup>5</sup>, Char Shine Liu<sup>4</sup>, Chao Shing Lee<sup>6</sup>, Crispin R. Wilson<sup>7</sup>, Tso-Ren Wu<sup>8</sup>, Ichsan Setiawan<sup>1,9,11</sup> and Van Bang Phung<sup>2</sup>

<sup>1</sup>Department of Marine Sciences, Faculty of Marine and Fisheries, Universitas Syiah Kuala, Banda Aceh, Indonesia.

<sup>2</sup>Institute of Earth Science, Academia Sinica, Taipei, Taiwan.

<sup>3</sup>Department of Earth Sciences, National Central University, Taoyuan, Taiwan.

<sup>4</sup>Ocean Center, National Taiwan University, Taipei, Taiwan.

<sup>5</sup>Ifremer, Department of Marine Geosciences, Plouzané, France.

<sup>6</sup>Institute of Geosciences, National Taiwan Ocean University, Keelung, Taiwan.

<sup>7</sup>ENC, Washington, D.C., USA.

<sup>8</sup>Graduate Institute of Hydrological and Oceanic Sciences, National Central University, Taoyuan, Taiwan.

<sup>9</sup>Research Center for Marine Sciences and Fisheries, Universitas Syiah Kuala, Banda Aceh, Indonesia.

<sup>10</sup>Tsunami and Disaster Mitigation Research Center, Universitas Syiah Kuala, Banda Aceh, Indonesia.

<sup>11</sup>Graduate School of Mathematics and Applied Sciences, Universitas Syiah Kuala, Banda Aceh, Indonesia.

<sup>12</sup>Department of Capture Fisheries, Marine and Fisheries Polytechnic Aceh, Great Aceh, Indonesia.

*Correspondence to:* Bor Shouh Huang ([hwbs@earth.sinica.edu.tw](mailto:hwbs@earth.sinica.edu.tw))

**Supplementary information:**

In line with our objectives to evaluate the possibility of the offshore extension of submarine environment of a strike-slip fault could produce a significant tsunami, the low Factor of Safety (FS) value at eastern offshore of Aceh island as it is shown in Fig. 6b, may also be seen as a candidate of a submarine landslide location and evaluate its capability to produce a tsunami. The location of the hypothetical submarine landslide as described in Table

2 and shown in Fig. 6c, are shown below (addition to the scenarios 4 and 7 that already shown in Figs. 8 and 9):

- Submarine Landslide Source Location 1 (Scenario 1)

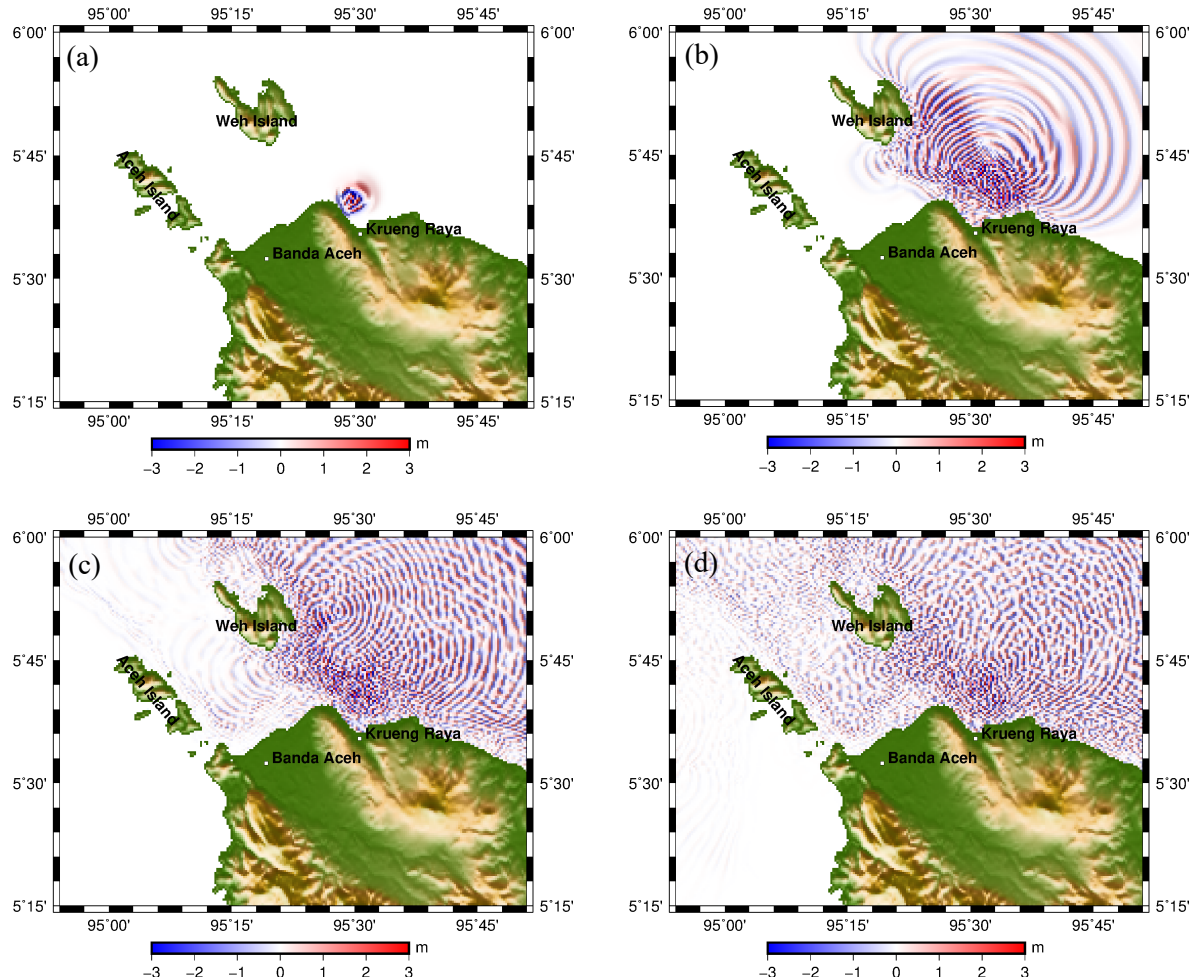

Figure S.1 Snapshot of tsunami wave from a submarine landslide source at location 1 of Fig. 6c, at propagation times: (a). 2 minutes, (b). 10 minutes, (c). 20 minutes and (d). 40 minutes.

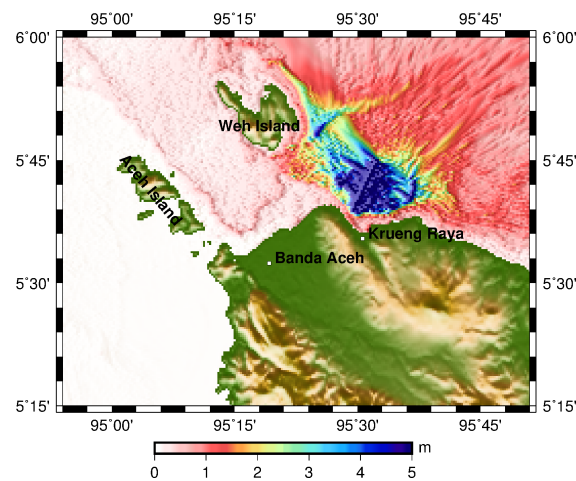

Figure S.2 Maximum tsunami wave amplitude from the corresponding source in Fig. S.1.

- Submarine Landslide Source Location 2 (Scenario 2)

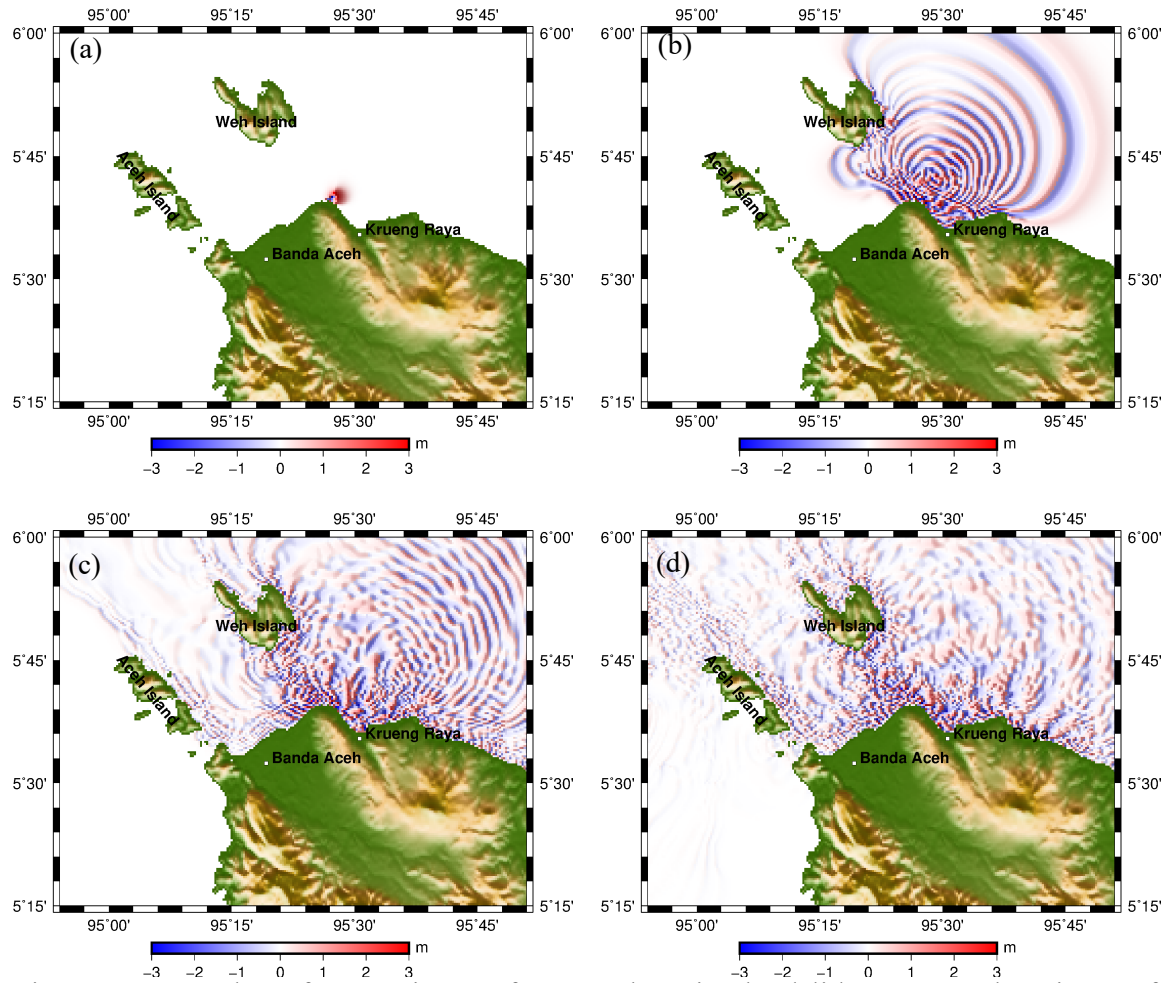

Figure S.3 Snapshot of tsunami wave from a submarine landslide source at location 2 of Fig. 6c, at propagation times: (a). 2 minutes, (b). 10 minutes, (c). 20 minutes and (d). 40 minutes.

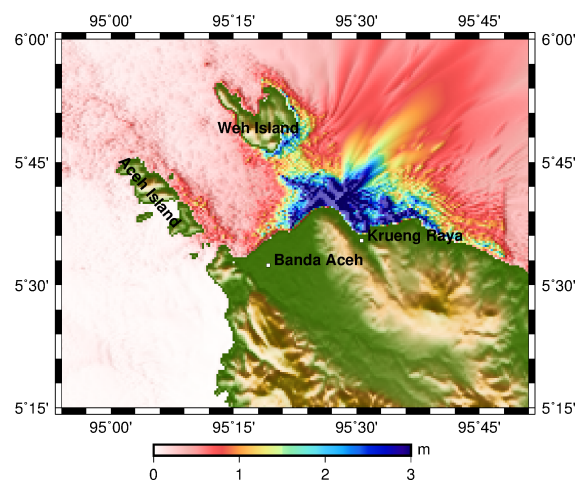

Figure S.4 Maximum tsunami wave amplitude from the corresponding source in Fig. S.3.

- Submarine Landslide Source Location 3 (Scenario 3)

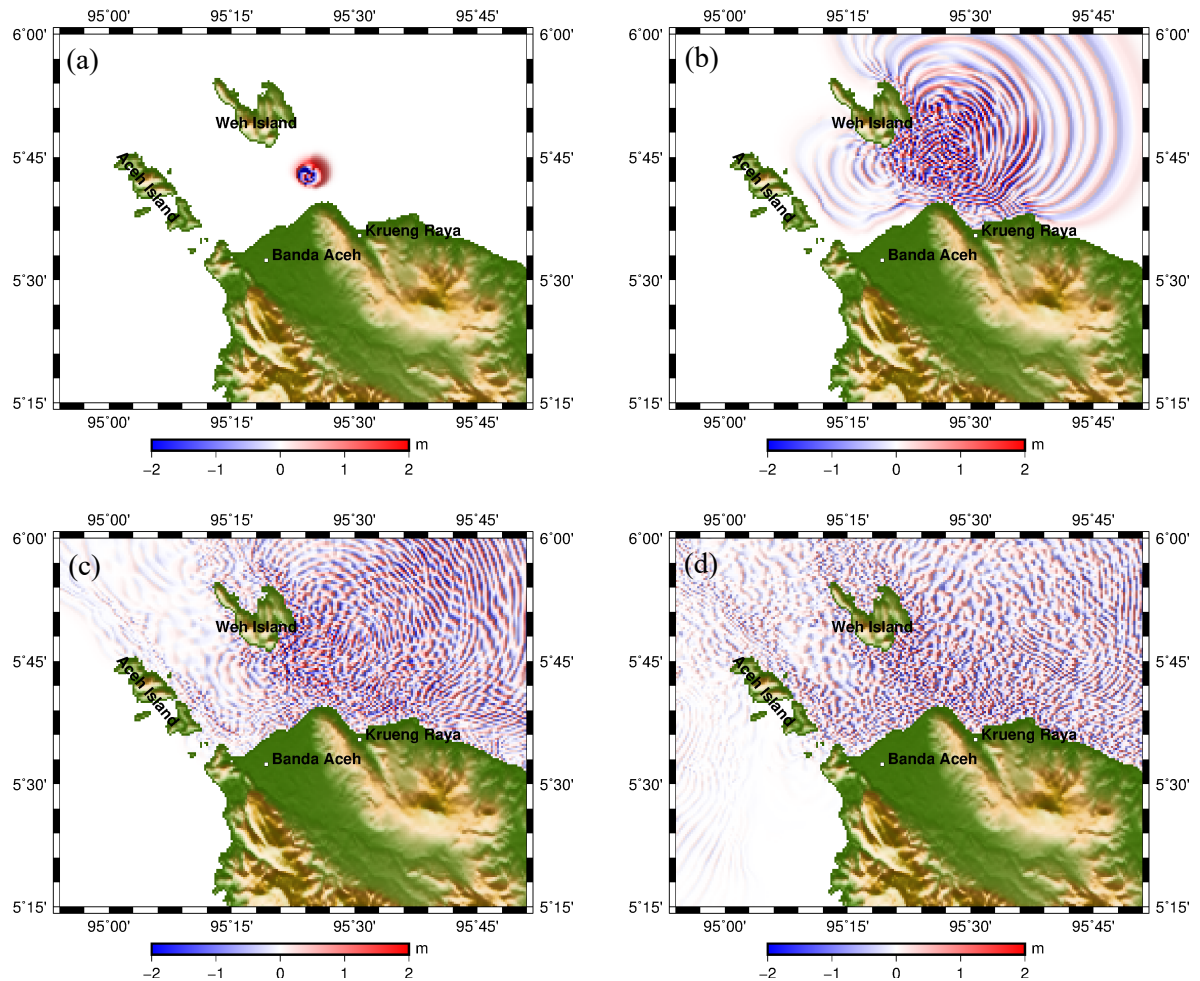

Figure S.5 Snapshot of tsunami wave from a submarine landslide source at location 3 of Fig. 6c, at propagation times: (a). 2 minutes, (b). 10 minutes, (c). 20 minutes and (d). 40 minutes.

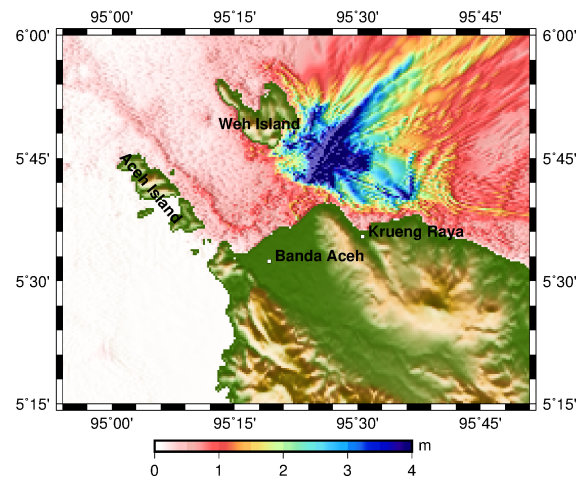

Figure S.6 Maximum tsunami wave amplitude from the corresponding source in Fig. S.5.



- Submarine Landslide Source Location 4 (Scenario 4)

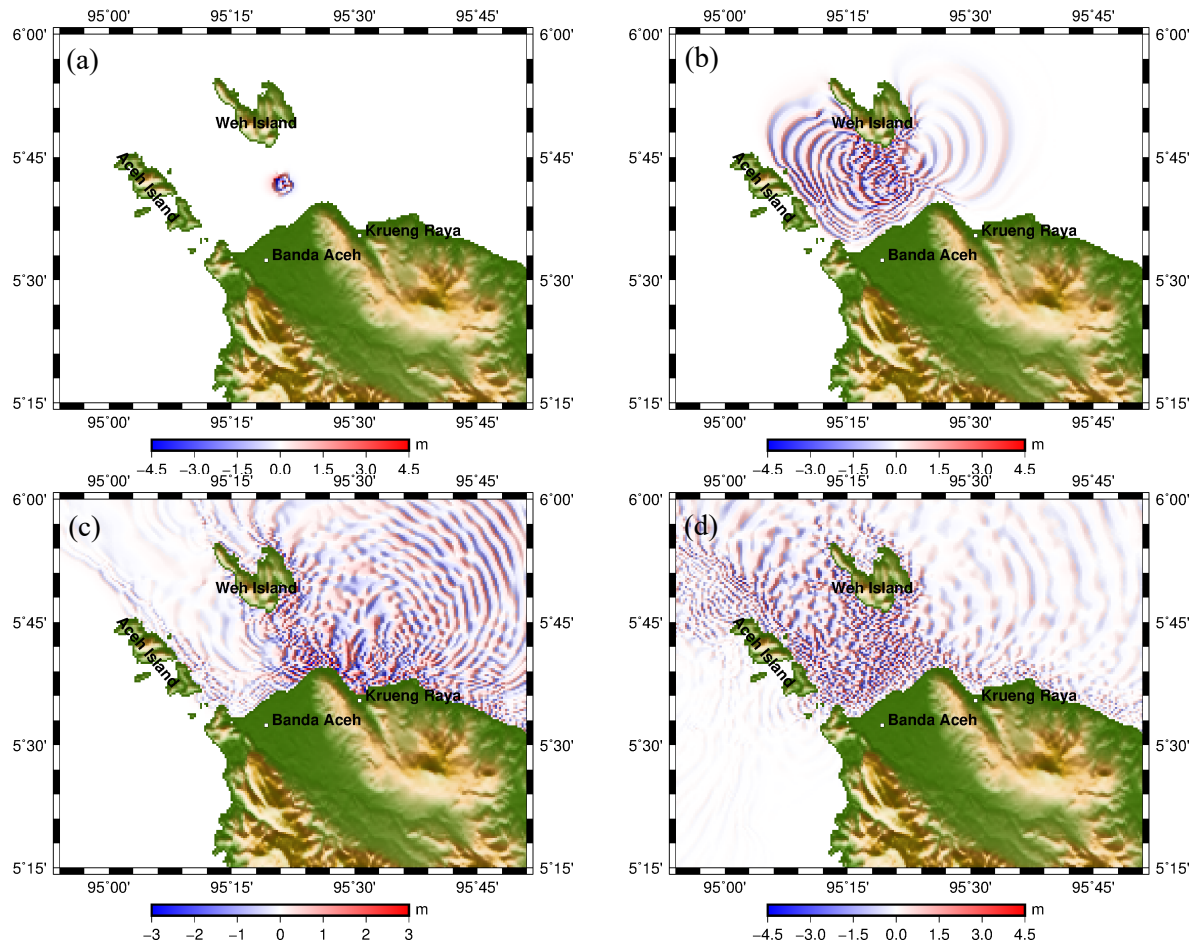

Figure S.7 Snapshot of tsunami wave from a submarine landslide source at location 4 of Fig. 6c, at propagation times: (a). 2 minutes, (b). 10 minutes, (c). 20 minutes and (d). 40 minutes.

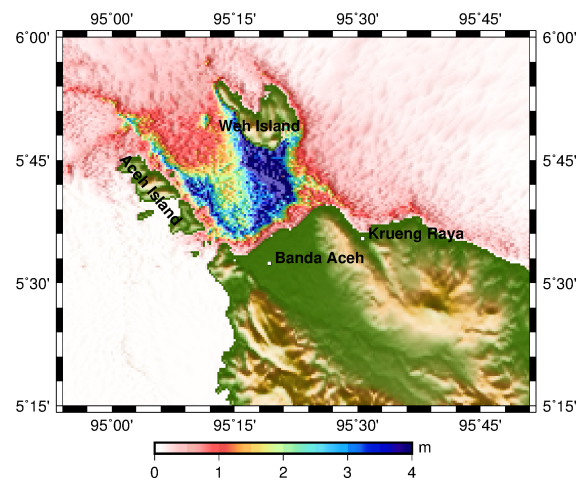

Figure S.8 Maximum tsunami wave amplitude from the corresponding source in Fig. S.7.

- Submarine Landslide Source Location 5 (Scenario 5)

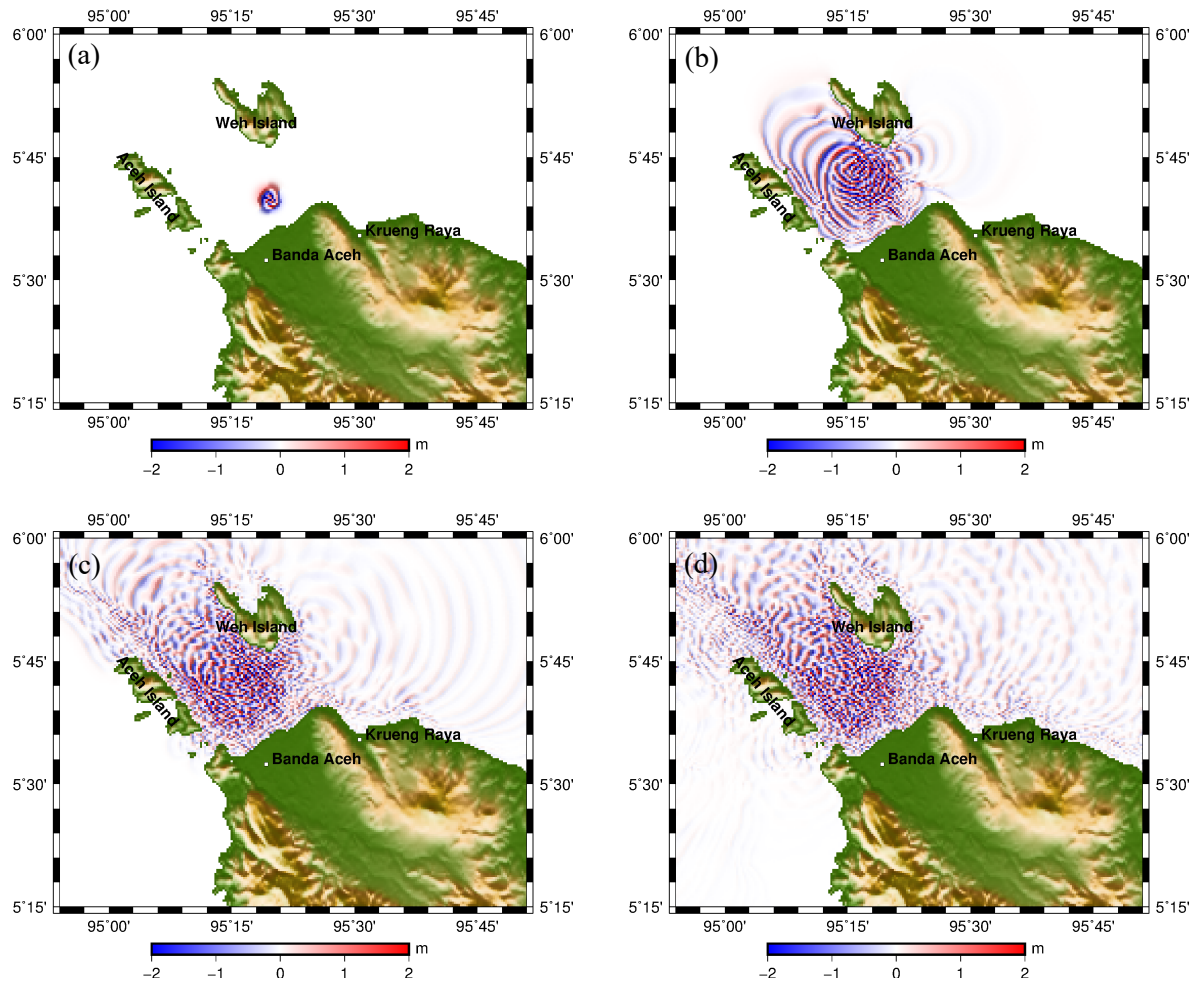

Figure S.9 Snapshot of tsunami wave from a submarine landslide source at location 5 of Fig. 6c, at propagation times: (a). 2 minutes, (b). 10 minutes, (c). 20 minutes and (d). 40 minutes.

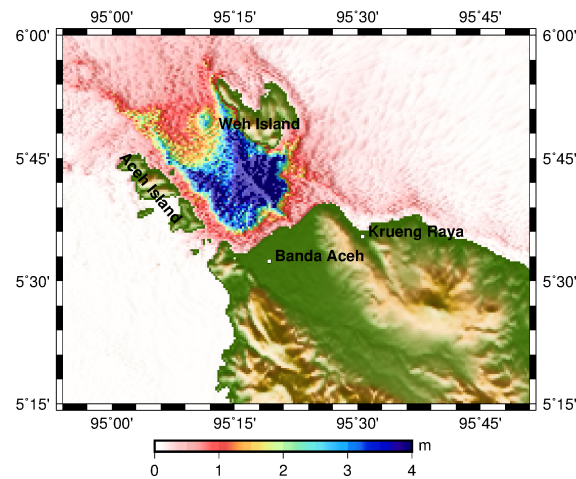

Figure S.10 Maximum tsunami wave amplitude from the corresponding source in Fig. S.9.

- Submarine Landslide Source Location 6 (Scenario 6)

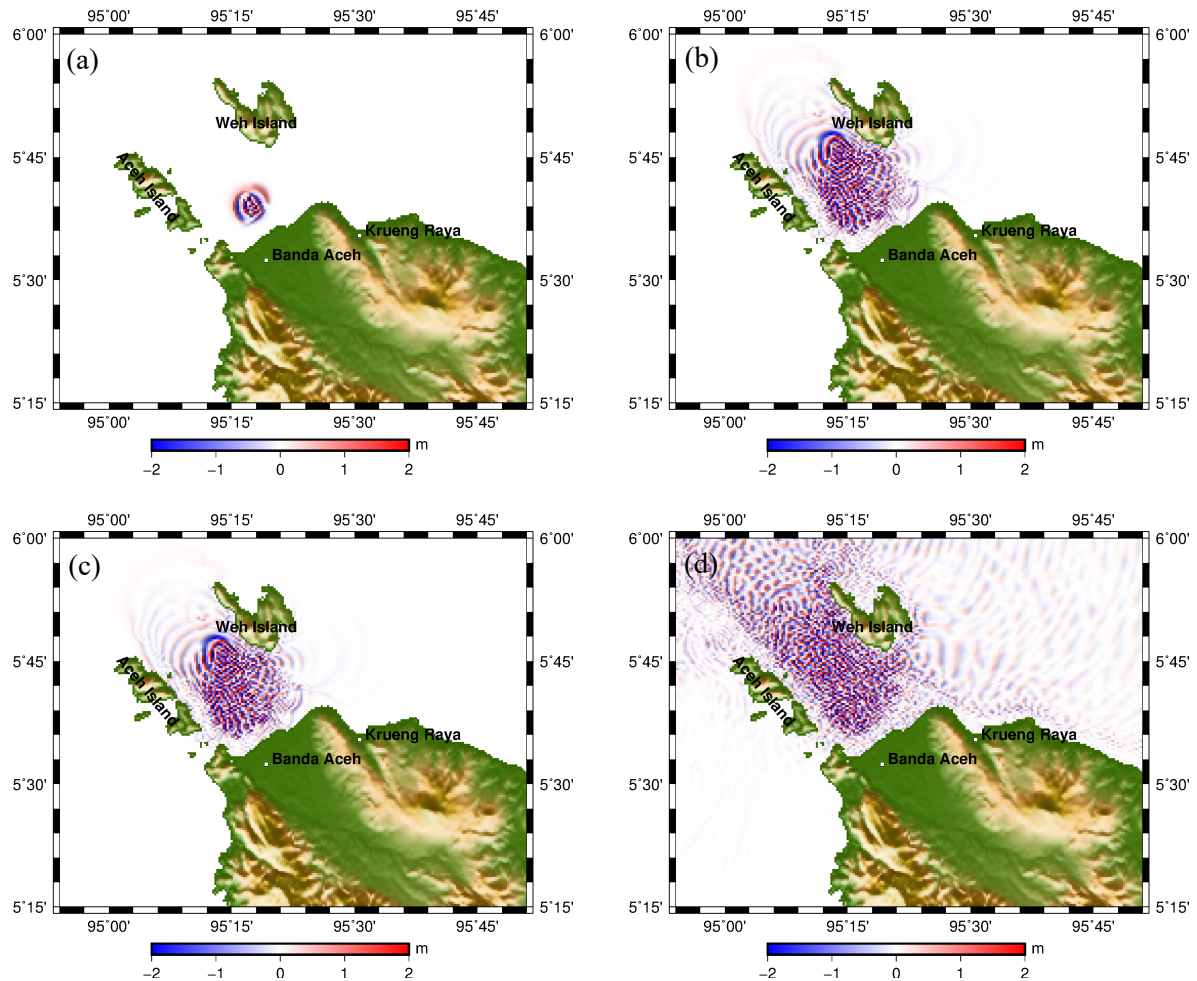

Figure S.11 Snapshot of tsunami wave from a submarine landslide source at location 6 of Fig. 6c, at propagation times: (a). 2 minutes, (b). 10 minutes, (c). 20 minutes and (d). 40 minutes.

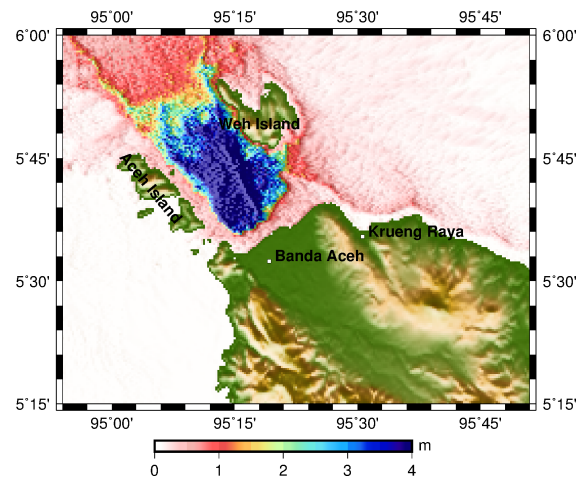

Figure S.12 Maximum tsunami wave amplitude from the corresponding source in Fig. S.11.

- Submarine Landslide Source Location 7 (Scenario 7)

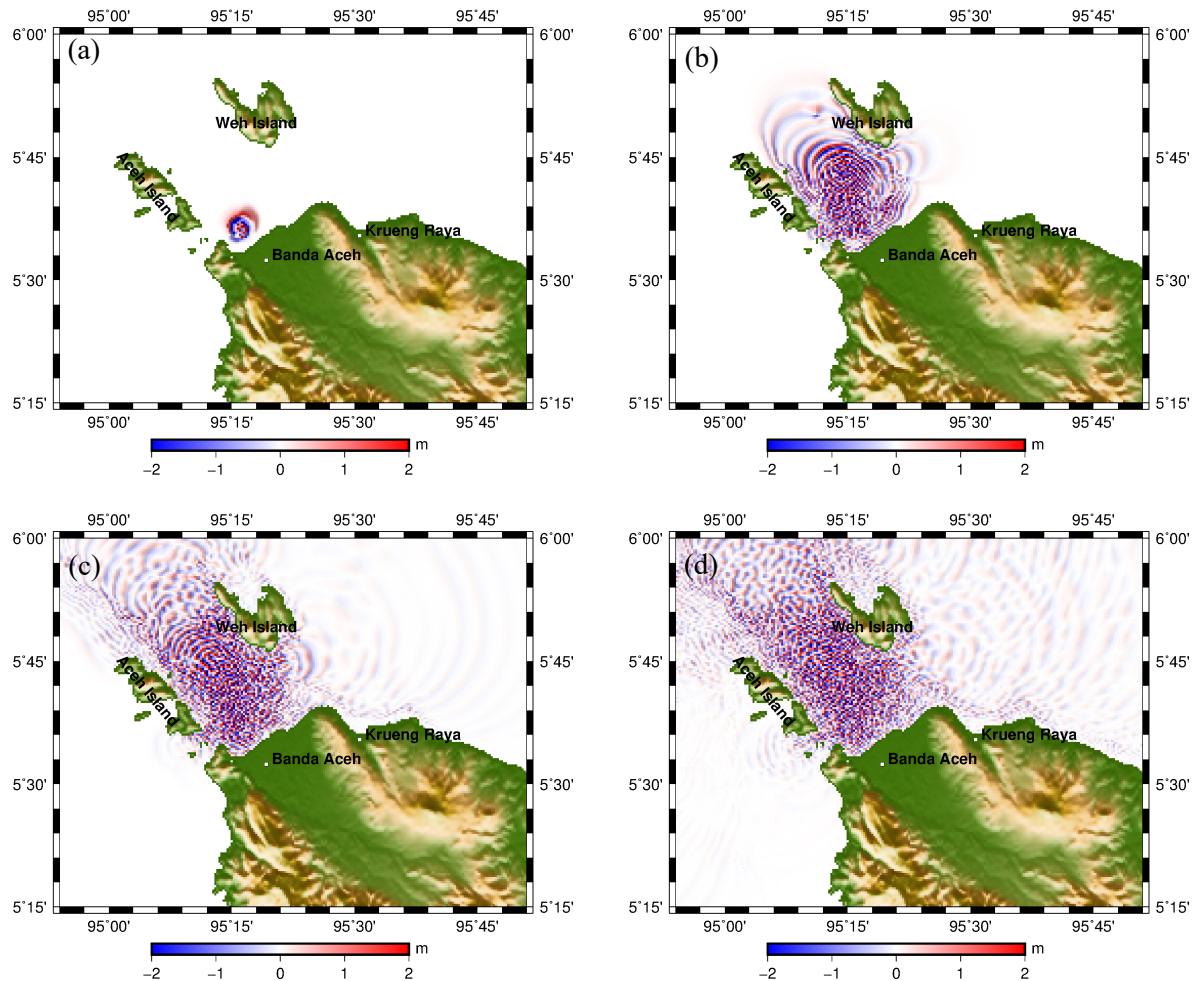

Figure S.13 Snapshot of tsunami wave from a submarine landslide source at location 7 of Fig. 6c, at propagation times: (a). 2 minutes, (b). 10 minutes, (c). 20 minutes and (d). 40 minutes.

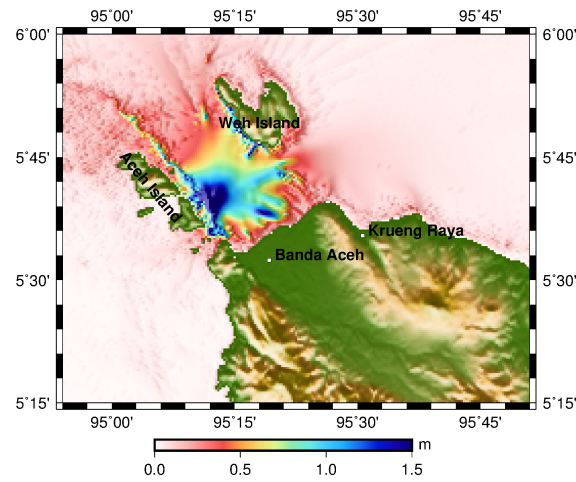

Figure S.14 Maximum tsunami wave amplitude from the corresponding source in Fig. S.13.



- Submarine Landslide Source Location 8 (Scenario 8)

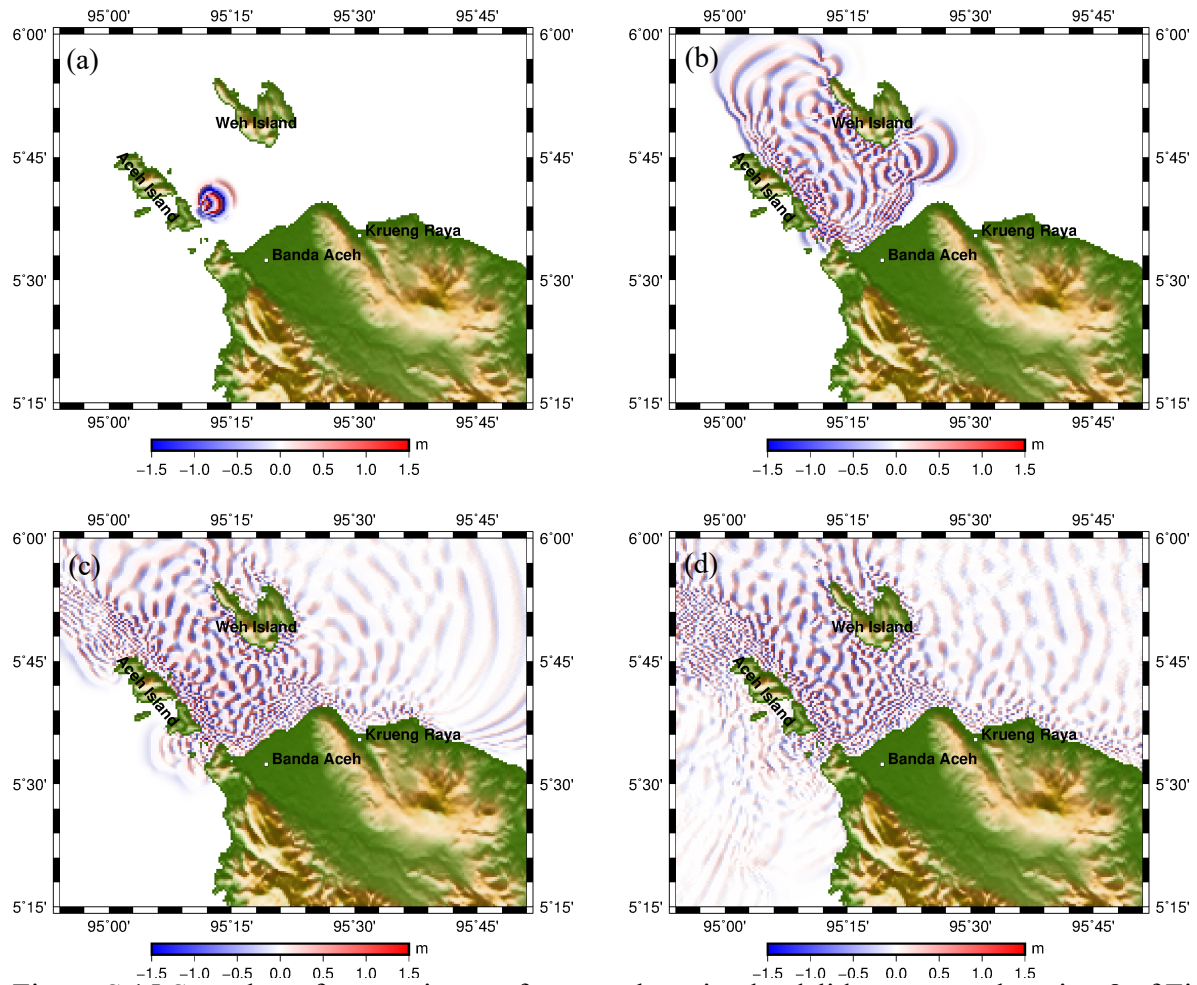

Figure S.15 Snapshot of tsunami wave from a submarine landslide source at location 8 of Fig. 3.6c, at propagation times: (a). 2 minutes, (b). 10 minutes, (c). 20 minutes and (d). 40 minutes.

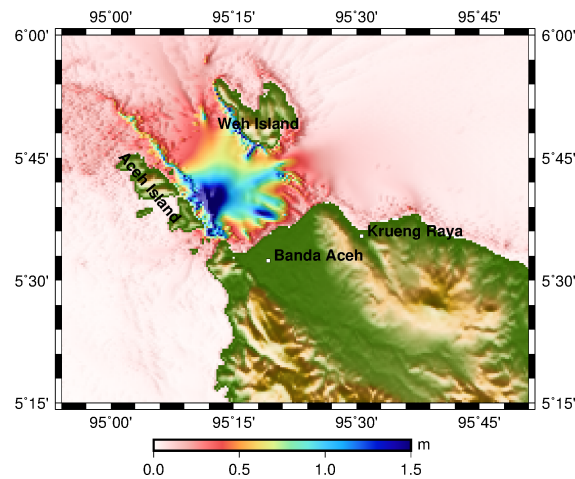

Figure S.16 Maximum tsunami wave amplitude from the corresponding source in Fig. S.15.
